# Supplementary material
Source: Springer Nature journal article supplement (https://www.springermedizin.de/resource/supplementary/12877_2007_79_MOESM1_ESM.pdf/9441130)
Supplement: MOESM1 [file 9441130]

Potential participants consulting the Accident and Emergency department  
or primary care physician after a fall incident

First home visit: participants signing  
informed consent and completing the risk profile

Risk profile score < 8  
Low-risk group

Risk profile score  $\geq$  8  
High-risk group (n=200)

Randomisation

Excluded from the RCT

Usual care  
(n=100)

Intervention  
(n=100)

One-year follow-up of fall incidents

Cost-evaluation 3, 6 and 12 months  
after the first home visit

Second home visit one year after  
the first home visit
